# Supplementary material for: Development and evaluation of a pH-responsive and water-soluble drug delivery system based on smart polymer coating of graphene nanosheets: an in silico study
Source: Royal Society of Chemistry journal article supplement (doi:10.1039/d0ra06705a), 2020-01-01
Supplement: d0ra06705a1.pdf [file d0ra06705a1.pdf]

# Designing a pH-responsive drug delivery system based on smart polymer coating of graphene nanosheet: A theoretical study

Abutaleb Alinejad<sup>1</sup>, Heidar Raissi<sup>2</sup> and Hassan Hashemzadeh<sup>3\*</sup>

<sup>1</sup> Department of Chemistry, Payame Noor University, Tehran, Iran,

Email: [abutaleblinejad@gmail.com](mailto:abutaleblinejad@gmail.com)

<sup>3</sup>Department of chemistry, University of Birjand, Birjand, Iran

Tel: +985632502064, Email: [hraeisi@birjand.ac.ir](mailto:hraeisi@birjand.ac.ir)

<sup>2</sup>Department of Chemistry, University of Birjand, Birjand, Iran

Tel: +985632502064, Email: [hashemzade\\_h@birjand.ac.ir](mailto:hashemzade_h@birjand.ac.ir)

\* Corresponding E-mail: [hashemzade\\_h@birjand.ac.ir](mailto:hashemzade_h@birjand.ac.ir)

**Figure S1.** The initial structure of A) graphene, B) DOX, and C) PEI molecules.

**Figure S2.** Close snapshots from the orientation of DOX molecule of graphene in A) G-DOX and B) G-pDOX systems. The DOX molecule is drawn in form of ball and stick type, while the graphene is drawn in tube form.

**Figure S3.** A) The RDF plot between drug molecule and graphene, B) atomic RDF between N atom of DOX and graphene and C) The density profile of drug molecule around of graphene surface.

**Figure S4.** The number of hydrogen bond between A) PEI and DOX and B) PEI and water in G-DOX@PEI and G-pDOX@pPEI systems.

**Table S1.** Details of the MD simulation systems.

**Table S2.** The non-bonded parameters set for graphene employed for all reported simulations.

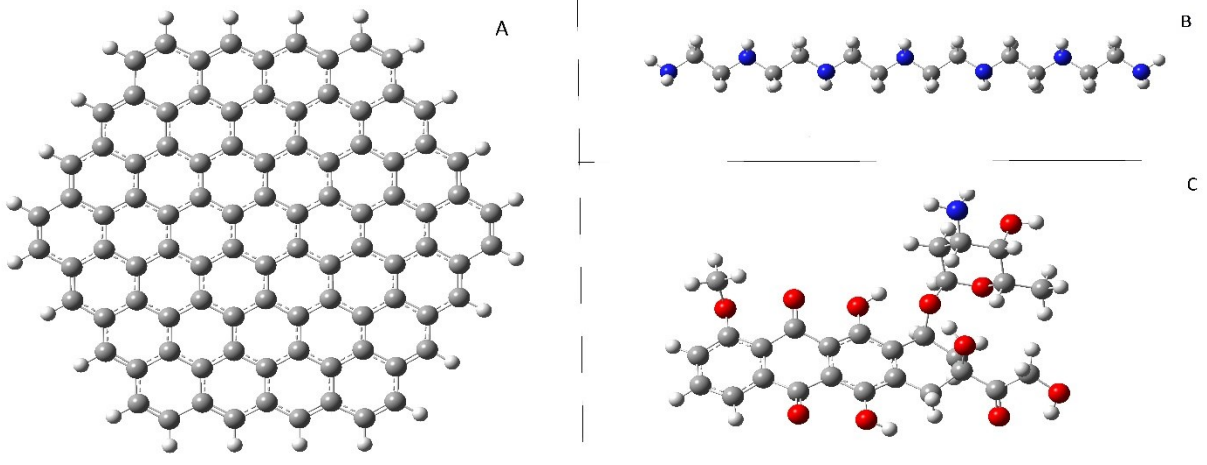

Figure S1 .The structure of A) graphene, B) DOX, and C) PEI molecules.

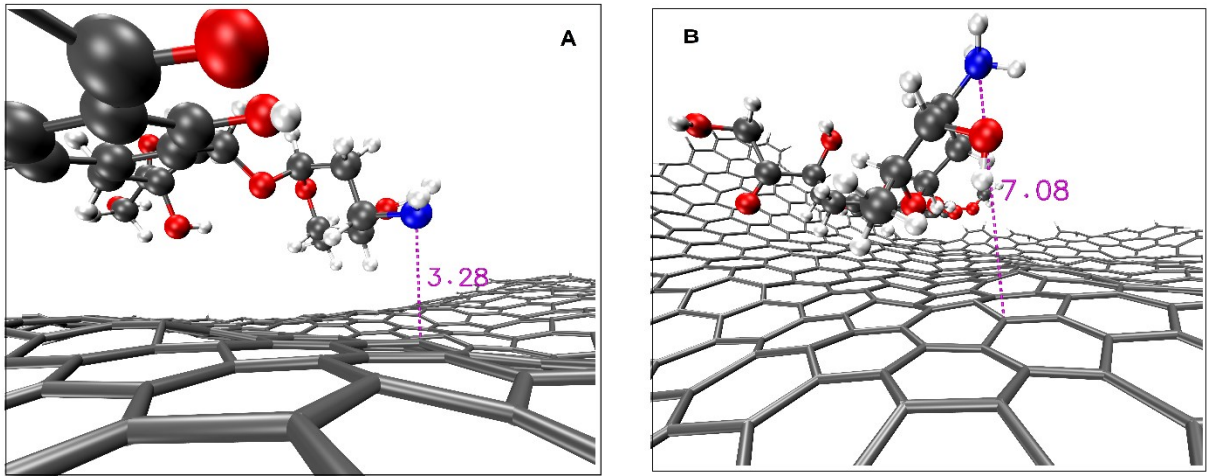

Figure S2. Close snapshots from the orientation of DOX molecule of graphene in A) G-DOX and B) G-pDOX systems. The DOX molecule is drawn in form of ball and stick type, while the graphene is drawn in tube form.

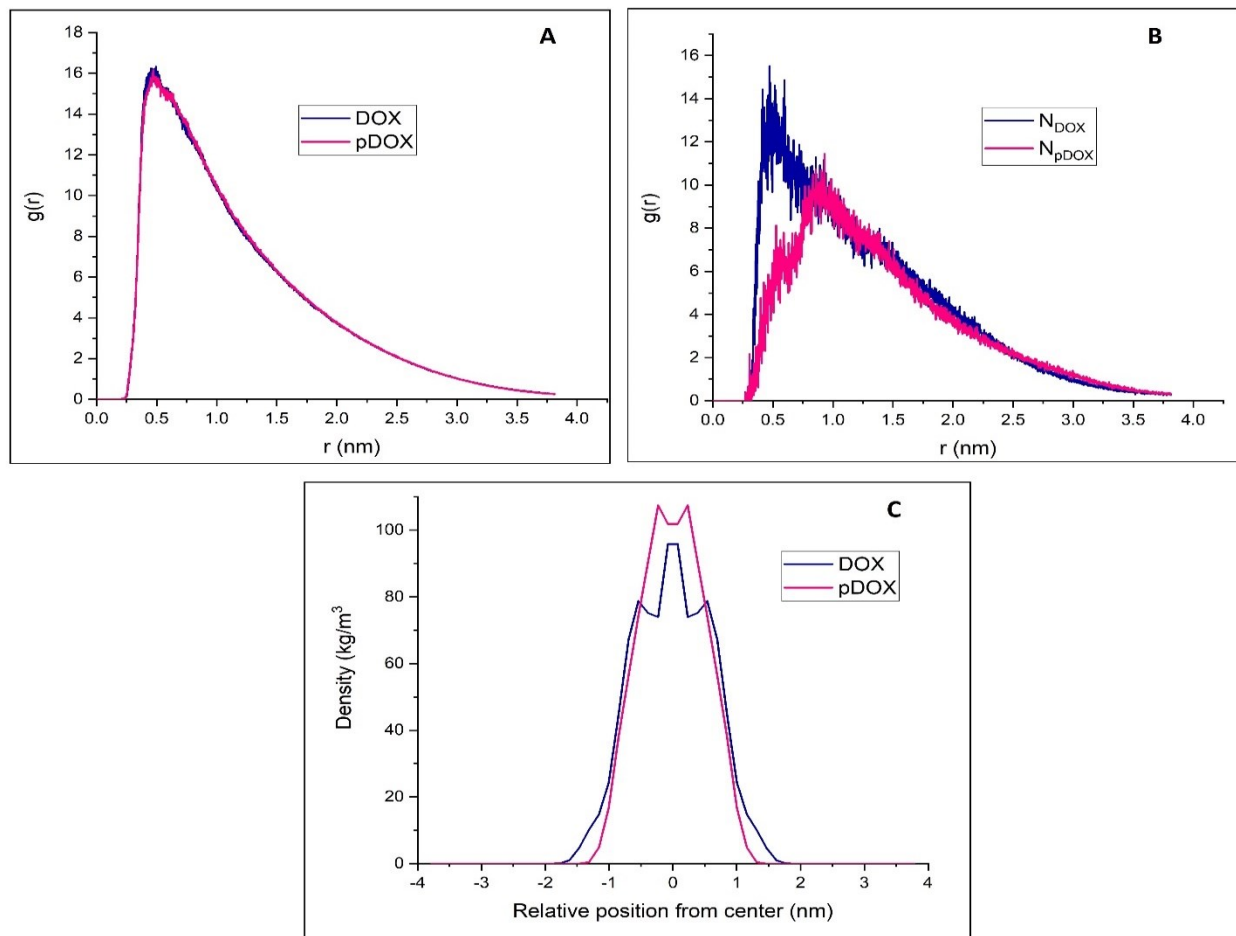

**Figure S3.** A) The RDF plot between drug molecule and graphene, B) atomic RDF between N atom of DOX and graphene and C) The density profile of drug molecule around of graphene surface in G-DOX and G-pDOX systems.

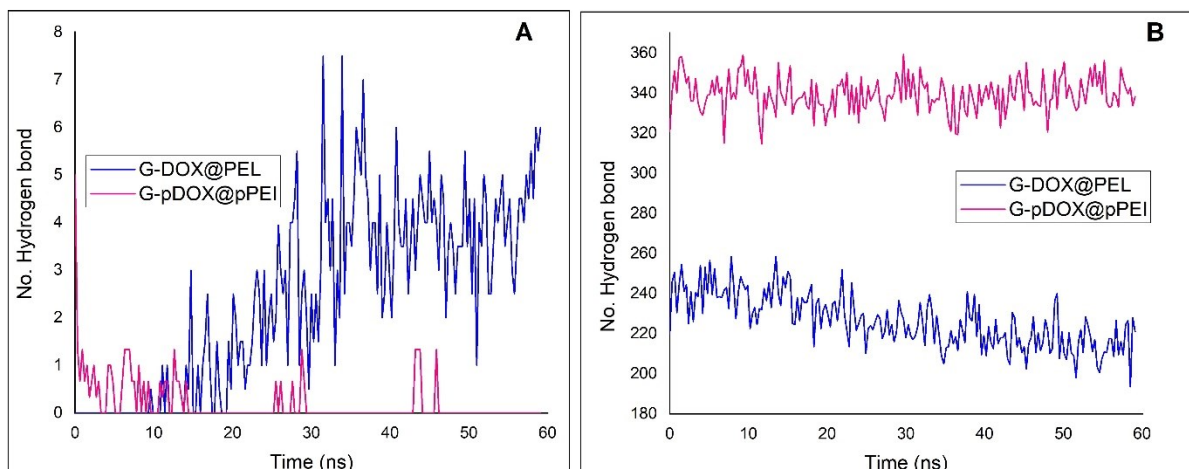

**Figure S4.** A) The number of hydrogen bonds between A) PEI and DOX and B) PEI and water in G-DOX@PEI and G-pDOX@pPEI systems.

**Table S1.** Details of the MD simulation systems.

| MD simulation box | No. of carrier (No. of atoms) | No. DOX (No. of atoms) | No. PEI chain (No. of atoms) | No. of water molecules | No. of total atoms | Box Size (nm <sup>3</sup> ) |
|-------------------|-------------------------------|------------------------|------------------------------|------------------------|--------------------|-----------------------------|
| G-DOX             | 1 (750 atoms)                 | 10 (670 atoms)         | -                            | 16344                  | 50452              | 8×8×8                       |
| G-pDOX            | 1 (750 atoms)                 | 10 (680 atoms)         | -                            | 16351                  | 50483              | 8×8×8                       |
| G-DOX@PEI         | 1 (750 atoms)                 | 10 (670 atoms)         | 10 (520 atoms)               | 16170                  | 50450              | 8×8×8                       |
| G-pDOX@pPEI       | 1 (750 atoms)                 | 10 (680 atoms)         | 10 (590 atoms)               | 16139                  | 50437              | 8×8×8                       |

S2.  
non-

|          | Atom | Sigma (Å <sup>o</sup> ) | Epsilon (kj/mol) |
|----------|------|-------------------------|------------------|
| Graphene | C    | 0.35500                 | 0.29288          |
|          | H    | 0.24200                 | 0.12552          |

Table  
The

bonded parameters set for graphene employed for all reported simulations.
